# Supplementary material
Source: publisher figshare collection journal article supplement (https://frontiersin.figshare.com/ndownloader/files/22303731)
Supplement: Supplementary file [file 22303731]

# Supplementary materials

## 1 Supplementary Figures and Tables

**Table S1.** Summary of ANOVA statistics.

| Effects                       | Conflict activity |        |         |        | Loss-gain activity |        |        |       |
|-------------------------------|-------------------|--------|---------|--------|--------------------|--------|--------|-------|
|                               | Early             |        | Late    |        | Early              |        | Late   |       |
|                               | Theta             | Alpha  | Theta   | Alpha  | Theta              | Alpha  | Theta  | Alpha |
| T(quad) × P                   | 0.37              | 2.91   | 0.74    | 1.08   | 0.00               | 3.13   | 0.05   | 0.01  |
| T(quad) × P × G               | 0.60              | 0.01   | 0.57    | 0.46   | 2.37               | 2.80   | 2.98   | 0.03  |
| T(quad) × P × C               | 0.52              | 2.35   | 5.17 *  | 4.81 * | 0.44               | 2.74   | 0.48   | 0.03  |
| T(quad) × P × G × C           | 0.21              | 0.00   | 0.07    | 0.78   | 0.09               | 4.15 * | 0.62   | 0.10  |
| T(quad) × P × S(lin)          | 6.73 *            | 0.13   | 2.34    | 0.11   | 1.91               | 0.66   | 5.08 * | 0.04  |
| T(quad) × P × S(quad)         | 0.43              | 1.66   | 7.44 ** | 0.56   | 0.03               | 0.08   | 2.45   | 0.18  |
| T(quad) × P × G × S(lin)      | 0.39              | 4.76 * | 6.41 *  | 0.07   | 2.55               | 0.93   | 1.40   | 3.53  |
| T(quad) × P × G × S(quad)     | 0.28              | 2.65   | 1.51    | 0.95   | 4.69 *             | 0.68   | 1.04   | 0.01  |
| T(quad) × P × C × S(lin)      | 0.82              | 0.24   | 0.02    | 0.68   | 6.95 *             | 0.41   | 2.25   | 1.63  |
| T(quad) × P × C × S(quad)     | 0.09              | 0.09   | 9.58 ** | 0.05   | 0.35               | 0.72   | 1.30   | 0.28  |
| T(quad) × P × G × C × S(lin)  | 3.15              | 3.03   | 7.14 *  | 0.78   | 0.04               | 0.73   | 1.01   | 1.93  |
| T(quad) × P × G × C × S(quad) | 0.00              | 0.18   | 2.46    | 4.31 * | 0.04               | 0.20   | 0.40   | 0.02  |

The values shown are F-ratios. The degrees of freedom for analyses of early and late phase activity are early phase: 1, 86; late phase: 1, 72. P, 'Payoff'; G, 'Gender'; S, 'Site'; T, 'Time', C, 'Choice task'. \* $p < 0.05$ ; \*\* $p < 0.005$  (not Bonferroni corrected; early theta conflict activity was a predicted effect). Effects common across tasks and gender are highlighted.

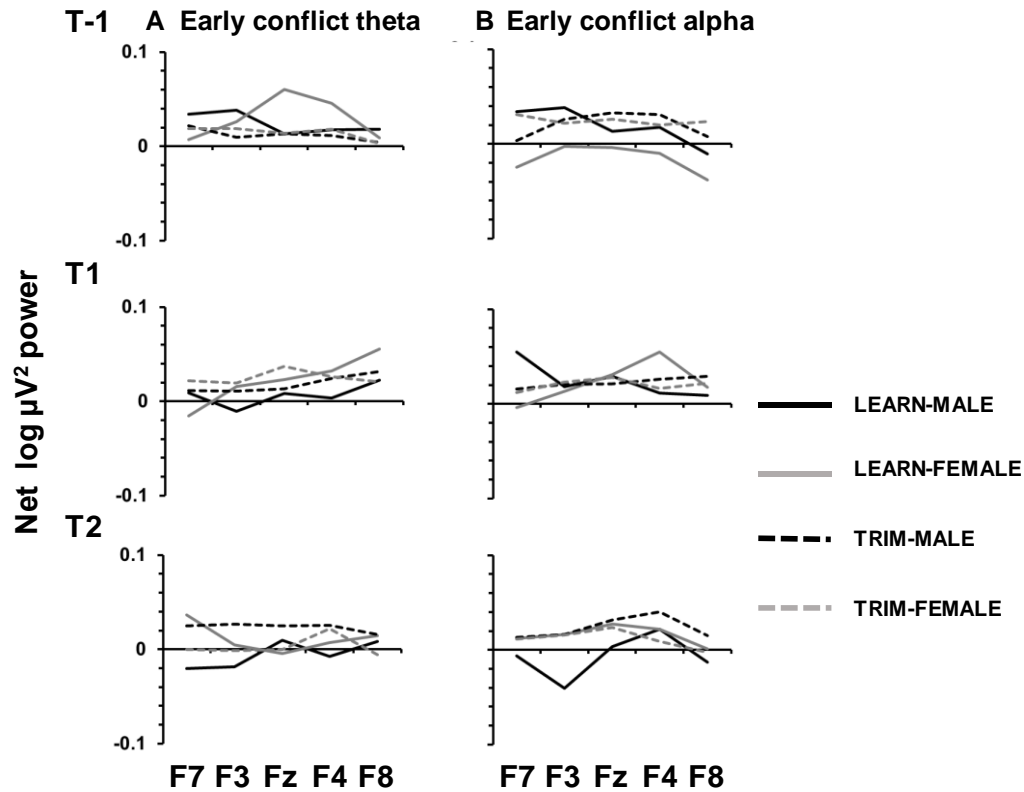

**Figure S1.** Variations of goal-conflict activity across the frontal scalp regions in the early phase. T1: 0.5s from the onset of the start-trial stimuli. T-1 and T2 indicate the 0.5s period immediately before and after T1.

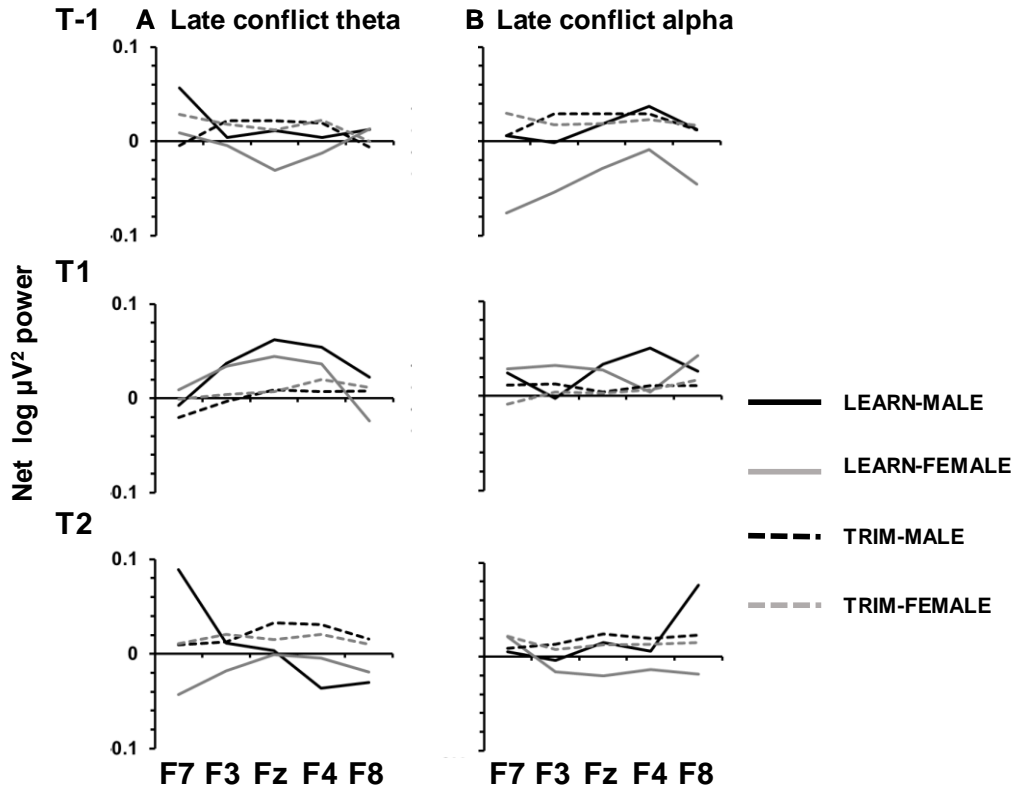

**Figure S2.** Variations of goal-conflict activity across the frontal scalp regions in the late phase. T1: 0.5s from the onset of the start-trial stimuli. T-1 and T2 indicate the 0.5s period immediately before and after T1.

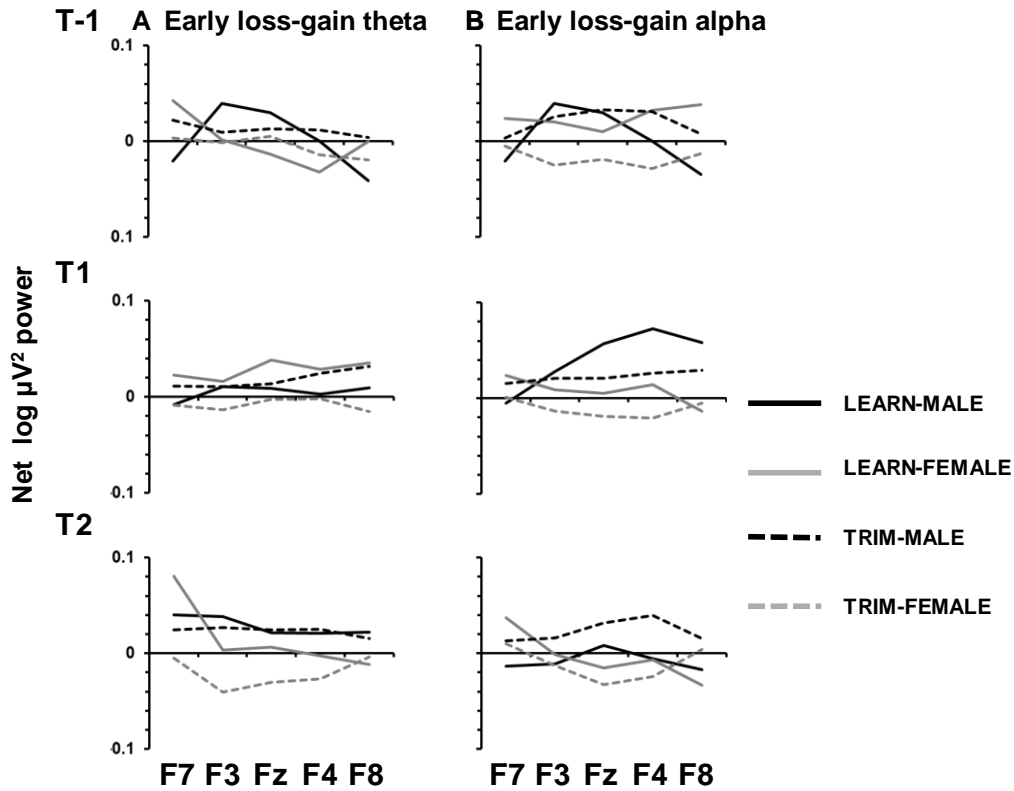

**Figure S3.** Variations of loss-gain activity across the frontal scalp regions in the early phase. T1: 0.5s from the onset of the start-trial stimuli. T-1 and T2 indicate the 0.5s period immediately before and after T1.

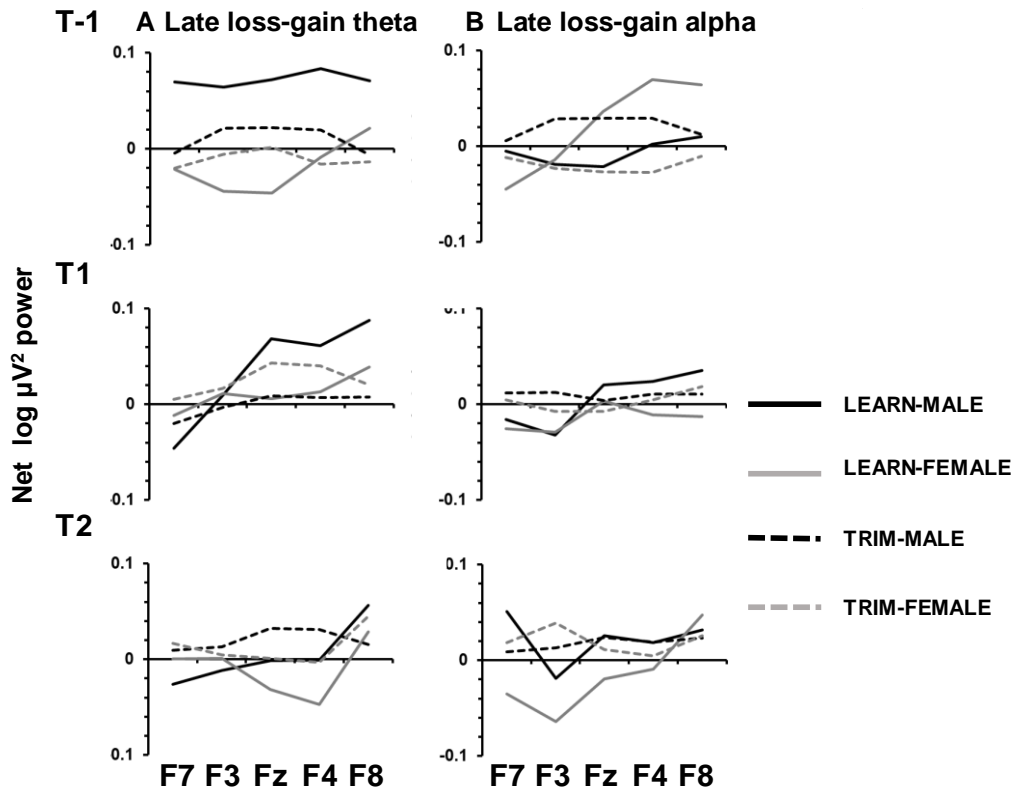

**Figure S4.** Variations of loss-gain activity across the frontal scalp regions in the late phase. T1: 0.5s from the onset of the start-trial stimuli. T-1 and T2 indicate the 0.5s period immediately before and after T1.
